# Supplementary material for: Reconstruction and signal propagation analysis of the Syk signaling network in breast cancer cells
Source: PubMed Central journal article supplement (PMC5376343; doi:10.1371/journal.pcbi.1005432), 2017-03-17

**A****Shortests** → **Weighted**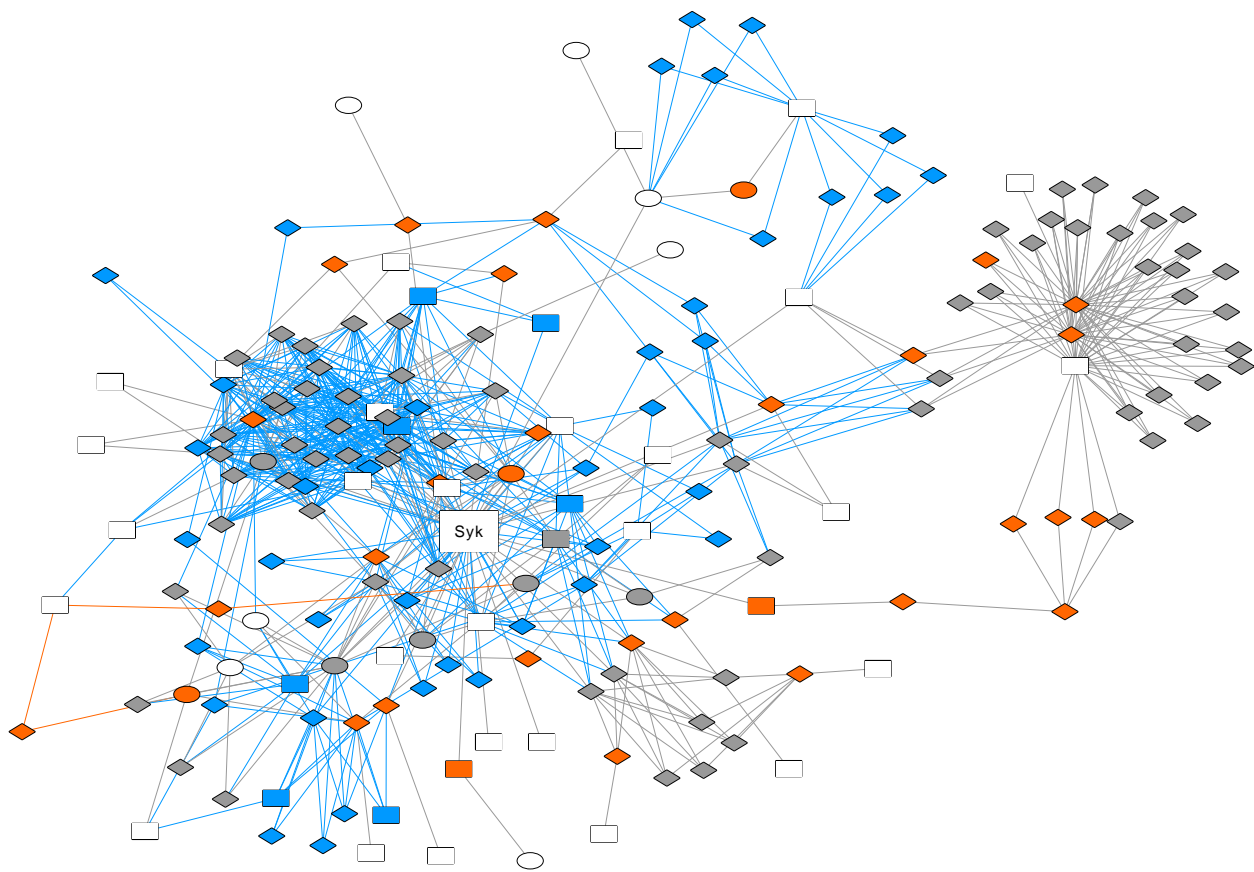**B****Weighted** → **Refined**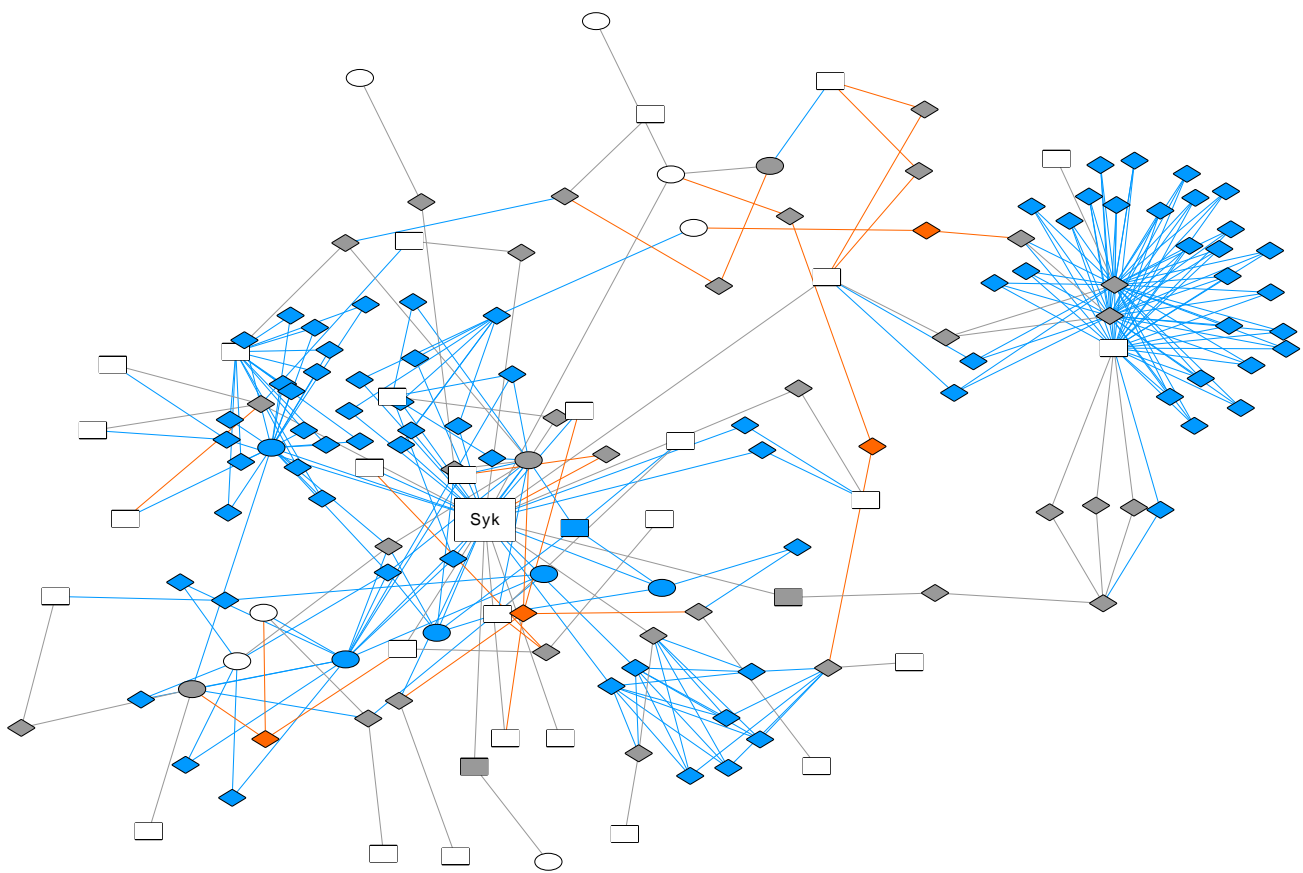

Supplement: pcbi.1005432.s010.pdf [file pcbi.1005432.s010.pdf]
