# Supplementary material for: Reconstruction and signal propagation analysis of the Syk signaling network in breast cancer cells
Source: PubMed Central journal article supplement (PMC5376343; doi:10.1371/journal.pcbi.1005432), 2017-03-17

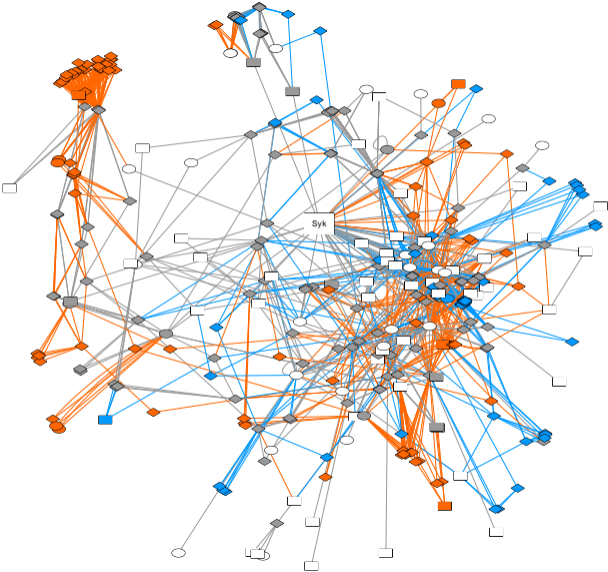

Supplement: pcbi.1005432.s014.pdf [file pcbi.1005432.s014.pdf]
