# Supplementary material for: Reconstruction and signal propagation analysis of the Syk signaling network in breast cancer cells
Source: PubMed Central journal article supplement (PMC5376343; doi:10.1371/journal.pcbi.1005432), 2017-03-17
Supplement: pcbi.1005432.s015.pdf [file pcbi.1005432.s015.pdf]

**A**

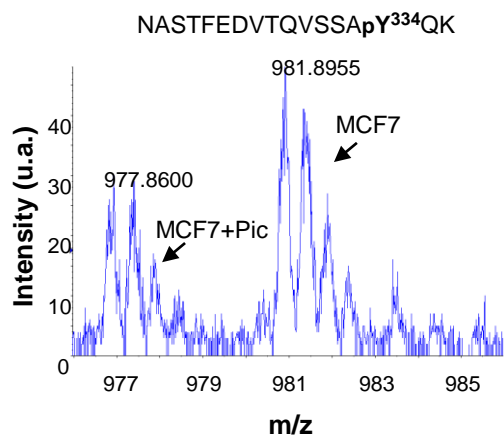

**B**

MS/MS Fragmentation of **NASTFEDVTQVSSApY<sup>334</sup>QK**  
 Found in SRC8\_HUMAN, **Q14247**|SRC8\_HUMAN Src substrate cortactin  
 Homo sapiens (Human)  
 Match from (981.895456,2+)

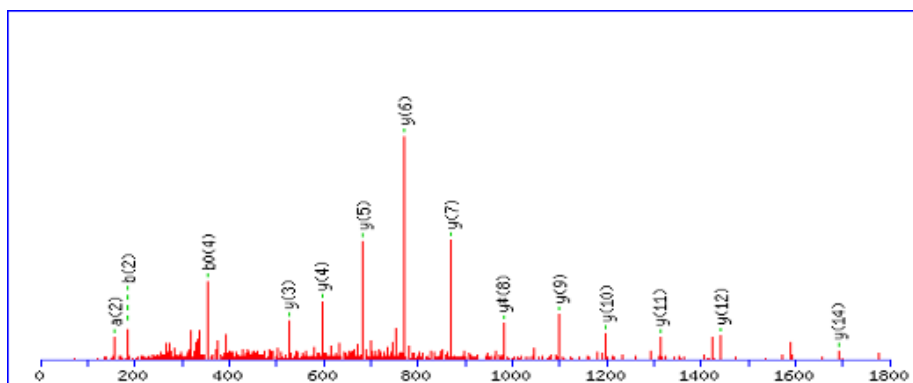

Variable modifications:  
 Y12 : Phospho (Y)  
 R20 : 13C 15N Arginine (R-full)  
 Ions Score: 71 Expect: 4.5e-05

| #  | a       | a++    | b       | b++    | b*      | b*++   | b0      | b0++   | Seq. | y       | y++    | y*      | y*++   | y0      | y0++   | #  |
|----|---------|--------|---------|--------|---------|--------|---------|--------|------|---------|--------|---------|--------|---------|--------|----|
| 1  | 87,06   | 44,03  | 115,05  | 58,03  | 98,02   | 49,52  |         |        | N    |         |        |         |        |         |        | 17 |
| 2  | 158,09  | 79,55  | 186,09  | 93,55  | 169,06  | 85,03  |         |        | A    | 1848,81 | 924,91 | 1831,79 | 916,4  | 1830,8  | 915,91 | 16 |
| 3  | 245,12  | 123,07 | 273,12  | 137,06 | 256,09  | 128,55 | 255,11  | 128,06 | S    | 1777,78 | 889,39 | 1760,75 | 880,88 | 1759,77 | 880,39 | 15 |
| 4  | 346,17  | 173,59 | 374,17  | 187,59 | 357,14  | 179,07 | 356,16  | 178,58 | T    | 1690,75 | 845,88 | 1673,72 | 837,36 | 1672,73 | 836,87 | 14 |
| 5  | 493,24  | 247,12 | 521,24  | 261,12 | 504,21  | 252,61 | 503,22  | 252,12 | F    | 1589,7  | 795,35 | 1572,67 | 786,84 | 1571,69 | 786,35 | 13 |
| 6  | 622,28  | 311,65 | 650,28  | 325,64 | 633,25  | 317,13 | 632,27  | 316,64 | E    | 1442,6  | 721,82 | 1425,6  | 713,3  | 1424,62 | 712,81 | 12 |
| 7  | 737,31  | 369,16 | 765,3   | 383,16 | 748,28  | 374,64 | 747,29  | 374,15 | D    | 1313,59 | 657,3  | 1296,56 | 648,78 | 1295,58 | 648,29 | 11 |
| 8  | 836,38  | 418,69 | 864,37  | 432,69 | 847,35  | 424,18 | 846,36  | 423,69 | V    | 1198,56 | 599,78 | 1181,53 | 591,27 | 1180,55 | 590,78 | 10 |
| 9  | 937,43  | 469,22 | 965,42  | 483,21 | 948,39  | 474,7  | 947,41  | 474,21 | T    | 1099,5  | 550,25 | 1082,46 | 541,74 | 1081,48 | 541,24 | 9  |
| 10 | 1065,48 | 533,25 | 1093,48 | 547,24 | 1076,45 | 538,73 | 1075,47 | 538,24 | Q    | 998,44  | 499,73 | 981,42  | 491,21 | 980,43  | 490,72 | 8  |
| 11 | 1164,55 | 582,78 | 1192,55 | 596,78 | 1175,52 | 588,26 | 1174,54 | 587,77 | V    | 870,38  | 435,7  | 853,36  | 427,18 | 852,37  | 426,69 | 7  |
| 12 | 1251,59 | 626,3  | 1279,58 | 640,29 | 1262,55 | 631,78 | 1261,57 | 631,29 | S    | 771,32  | 386,16 | 754,29  | 377,65 | 753,31  | 377,16 | 6  |
| 13 | 1338,62 | 669,81 | 1366,61 | 683,81 | 1349,59 | 675,3  | 1348,6  | 674,8  | S    | 684,28  | 342,65 | 667,26  | 334,13 | 666,27  | 333,64 | 5  |
| 14 | 1409,65 | 705,33 | 1437,65 | 719,33 | 1420,62 | 710,81 | 1419,64 | 710,32 | A    | 597,25  | 299,13 | 580,23  | 290,62 |         |        | 4  |
| 15 | 1652,68 | 826,85 | 1680,68 | 840,84 | 1663,65 | 832,33 | 1662,67 | 831,84 | Y    | 526,22  | 263,61 | 509,19  | 255,1  |         |        | 3  |
| 16 | 1780,74 | 890,87 | 1808,74 | 904,87 | 1791,71 | 896,36 | 1790,73 | 895,87 | Q    | 283,19  | 142,1  | 266,16  | 133,58 |         |        | 2  |
| 17 |         |        |         |        |         |        |         |        | K    | 155,13  | 78,07  | 138,1   | 69,55  |         |        | 1  |
