# Supplementary material for: Reconstruction and signal propagation analysis of the Syk signaling network in breast cancer cells
Source: PubMed Central journal article supplement (PMC5376343; doi:10.1371/journal.pcbi.1005432), 2017-03-17
Supplement: pcbi.1005432.s016.pdf [file pcbi.1005432.s016.pdf]

**A**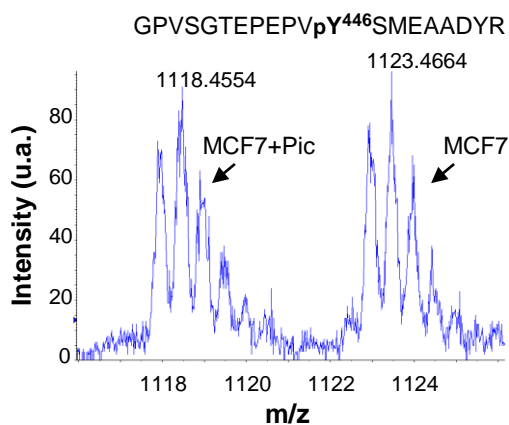**B**

MS/MS Fragmentation of **GPVSGTEPEPVpY<sup>446</sup>SMEAADYR**  
 Found in SRC8\_HUMAN, **Q14247**|SRC8\_HUMAN Src substrate cortactin  
 Homo sapiens (Human)  
 Match from (1122.949628,2+)

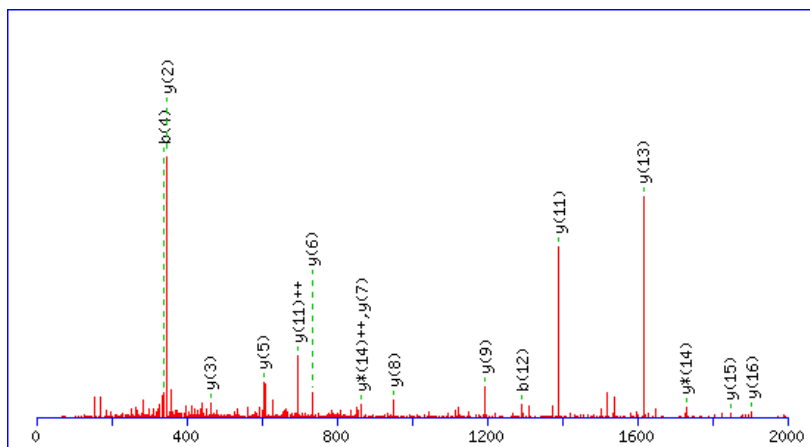

Variable modifications:  
 Y12 : Phospho (Y)  
 R20 : 13C 15N Arginine (R-full)  
 Ions Score: 71 Expect: 4.5e-05

| #  | b       | b++    | b*      | b*++   | b0      | b0++   | Seq. | y       | y++    | y*      | y*++   | y0      | y0++   | #  |
|----|---------|--------|---------|--------|---------|--------|------|---------|--------|---------|--------|---------|--------|----|
| 1  | 129.07  | 65.04  | 112.04  | 56.52  |         |        | Q    |         |        |         |        |         |        | 16 |
| 2  | 200.10  | 100.56 | 183.08  | 92.04  |         |        | A    | 1717.76 | 859.38 | 1700.73 | 850.87 | 1699.75 | 850.38 | 15 |
| 3  | 313.19  | 157.10 | 296.16  | 148.58 |         |        | L    | 1646.72 | 823.87 | 1629.70 | 815.35 | 1628.71 | 814.86 | 14 |
| 4  | 441.25  | 221.13 | 424.22  | 212.61 |         |        | Q    | 1533.64 | 767.32 | 1516.61 | 758.81 | 1515.63 | 758.32 | 13 |
| 5  | 556.27  | 278.64 | 539.25  | 270.13 | 538.26  | 269.63 | D    | 1405.58 | 703.29 | 1388.56 | 694.78 | 1387.57 | 694.29 | 12 |
| 6  | 669.36  | 335.18 | 652.33  | 326.67 | 651.35  | 326.18 | L    | 1290.55 | 645.78 | 1273.53 | 637.27 | 1272.54 | 636.78 | 11 |
| 7  | 782.44  | 391.72 | 765.41  | 383.21 | 764.43  | 382.72 | L    | 1177.47 | 589.24 | 1160.44 | 580.73 | 1159.46 | 580.23 | 10 |
| 8  | 869.47  | 435.24 | 852.45  | 426.73 | 851.46  | 426.23 | S    | 1064.39 | 532.70 | 1047.36 | 524.18 | 1046.38 | 523.69 | 9  |
| 9  | 998.52  | 499.76 | 981.49  | 491.25 | 980.50  | 490.76 | E    | 977.35  | 489.18 | 960.33  | 480.67 | 959.34  | 480.18 | 8  |
| 10 | 1241.54 | 621.28 | 1224.52 | 612.76 | 1223.53 | 612.27 | Y    | 848.31  | 424.66 | 831.29  | 416.15 |         |        | 7  |
| 11 | 1372.59 | 686.80 | 1355.56 | 678.28 | 1354.57 | 677.79 | M    | 605.28  | 303.14 | 588.26  | 294.63 |         |        | 6  |
| 12 | 1429.61 | 715.31 | 1412.58 | 706.79 | 1411.60 | 706.30 | G    | 474.24  | 237.62 | 457.22  | 229.11 |         |        | 5  |
| 13 | 1543.65 | 772.33 | 1526.62 | 763.82 | 1525.64 | 763.32 | N    | 417.22  | 209.11 | 400.19  | 200.60 |         |        | 4  |
| 14 | 1614.69 | 807.85 | 1597.66 | 799.33 | 1596.68 | 798.84 | A    | 303.18  | 152.09 | 286.15  | 143.58 |         |        | 3  |
| 15 | 1671.71 | 836.36 | 1654.68 | 827.84 | 1653.70 | 827.35 | G    | 232.14  | 116.57 | 215.11  | 108.06 |         |        | 2  |
| 16 |         |        |         |        |         |        | R    | 175.12  | 88.06  | 158.09  | 79.55  |         |        | 1  |
