# Supplementary material for: Reconstruction and signal propagation analysis of the Syk signaling network in breast cancer cells
Source: PubMed Central journal article supplement (PMC5376343; doi:10.1371/journal.pcbi.1005432), 2017-03-17
Supplement: pcbi.1005432.s018.pdf [file pcbi.1005432.s018.pdf]

MS/MS Fragmentation of **SQEQLAAELAEpY<sup>424</sup>TAK**  
 Found in EZRI\_HUMAN, **P15311**|EZRI\_HUMAN Ezrin  
 Homo sapiens (Human)  
 Match from (866.393092,2+)

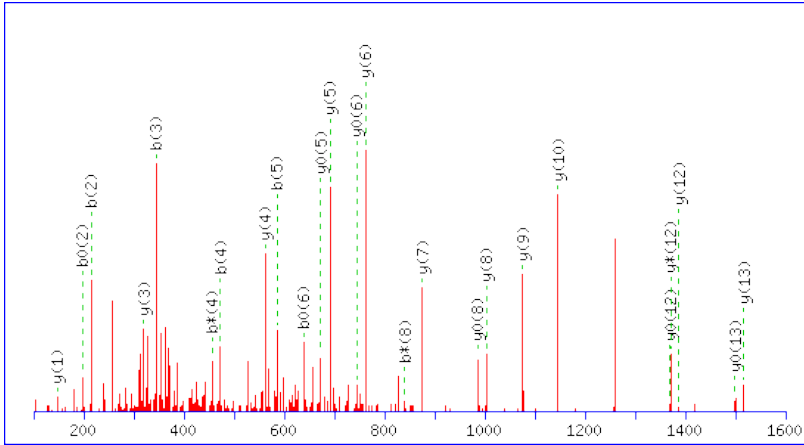

Monoisotopic mass of neutral peptide Mr(calc): 1730.78

Variable modifications:

Y12 : Phospho (Y)

Ions Score: 75 Expect: 4.1e-06

Matches (Bold Red): 25/162 fragment ions using 46 most intense peaks

| #  | b             | b <sup>++</sup> | b <sup>*</sup> | b <sup>+++</sup> | b <sup>0</sup> | b <sup>0++</sup> | Seq. | y              | y <sup>++</sup> | y <sup>*</sup> | y <sup>+++</sup> | y <sup>0</sup> | y <sup>0++</sup> | #  |
|----|---------------|-----------------|----------------|------------------|----------------|------------------|------|----------------|-----------------|----------------|------------------|----------------|------------------|----|
| 1  | 88.04         | 44.52           |                |                  | 70.03          | 35.52            | S    |                |                 |                |                  |                |                  | 15 |
| 2  | <b>216.10</b> | 108.55          | 199.07         | 100.04           | <b>198.09</b>  | 99.55            | Q    | 1644.75        | 822.88          | 1627.73        | 814.37           | 1626.74        | 813.87           | 14 |
| 3  | <b>345.14</b> | 173.07          | 328.11         | 164.56           | 327.13         | 164.07           | E    | <b>1516.69</b> | 758.85          | 1499.67        | 750.34           | <b>1498.68</b> | 749.84           | 13 |
| 4  | <b>473.20</b> | 237.10          | <b>456.17</b>  | 228.59           | 455.19         | 228.10           | Q    | <b>1387.65</b> | 694.33          | <b>1370.62</b> | 685.82           | <b>1369.64</b> | 685.32           | 12 |
| 5  | <b>586.28</b> | 293.65          | 569.26         | 285.13           | 568.27         | 284.64           | L    | 1259.59        | 630.30          | 1242.57        | 621.79           | 1241.58        | 621.29           | 11 |
| 6  | 657.32        | 329.16          | 640.29         | 320.65           | <b>639.31</b>  | 320.16           | A    | <b>1146.51</b> | 573.76          | 1129.48        | 565.24           | 1128.50        | 564.75           | 10 |
| 7  | 728.36        | 364.68          | 711.33         | 356.17           | 710.35         | 355.68           | A    | <b>1075.47</b> | 538.24          | 1058.44        | 529.73           | 1057.46        | 529.23           | 9  |
| 8  | 857.40        | 429.20          | <b>840.37</b>  | 420.69           | 839.39         | 420.20           | E    | <b>1004.43</b> | 502.72          | 987.41         | 494.21           | <b>986.42</b>  | 493.72           | 8  |
| 9  | 970.48        | 485.75          | 953.46         | 477.23           | 952.47         | 476.74           | L    | <b>875.39</b>  | 438.20          | 858.36         | 429.69           | 857.38         | 429.19           | 7  |
| 10 | 1041.52       | 521.26          | 1024.49        | 512.75           | 1023.51        | 512.26           | A    | <b>762.31</b>  | 381.66          | 745.28         | 373.14           | <b>744.30</b>  | 372.65           | 6  |
| 11 | 1170.56       | 585.79          | 1153.54        | 577.27           | 1152.55        | 576.78           | E    | <b>691.27</b>  | 346.14          | 674.24         | 337.63           | <b>673.26</b>  | 337.13           | 5  |
| 12 | 1413.59       | 707.30          | 1396.57        | 698.79           | 1395.58        | 698.30           | Y    | <b>562.23</b>  | 281.62          | 545.20         | 273.10           | 544.22         | 272.61           | 4  |
| 13 | 1514.64       | 757.82          | 1497.61        | 749.31           | 1496.63        | 748.82           | T    | <b>319.20</b>  | 160.10          | 302.17         | 151.59           | 301.19         | 151.10           | 3  |
| 14 | 1585.68       | 793.34          | 1568.65        | 784.83           | 1567.67        | 784.34           | A    | 218.15         | 109.58          | 201.12         | 101.07           |                |                  | 2  |
| 15 |               |                 |                |                  |                |                  | K    | <b>147.11</b>  | 74.06           | 130.09         | 65.55            |                |                  | 1  |
